# Supplementary material for: Selection of aptamers for AMACR detection from DNA libraries with different primers
Source: PubMed Central journal article supplement — RSC Adv. 2018 May 23;8(34):19067–74. doi: 10.1039/c8ra01808a (PMC9080631; doi:10.1039/c8ra01808a), 2018-05-23
Supplement: RA-008-C8RA01808A-s001.pdf [file RA-008-C8RA01808A-s001.pdf]

**Supplementary Information for**

**“Selection of Aptamers for AMACR Detection from the  
DNA Libraries with Different Primers”**

Deng-Kai Yang<sup>a,b</sup>, Chia-Fu Chou<sup>b</sup>, Lin-Chi Chen<sup>\*a</sup> / <sup>a</sup>National Taiwan University; <sup>b</sup>Academia Sinica,  
Taiwan, R.O.C.

\*Corresponding author: E-mail: chenlinchi@ntu.edu.tw / Fax: +886-2-2362-7620

**Materials**

Bovine serum albumin (BSA), human serum albumin (HSA), acid-washed glass bead, and (3glycidylxypropyl) trimethoxy-silane (GLYMO) were all purchased from Sigma-Aldrich (St. Louis, MO). Homemade recombinant AMACR protein for comparison was from Prof. Hsu, Chun-Hua's lab. Synthesized oligonucleotide sequences were purchased from Integrated DNA Technologies (Coralville, IA). Real-time quantitative PCR kit was purchased from Qiagen (Venlo, Netherlands). PCR kit and Centri-Sep™ Spin Column were purchased from Life Technologies (Grand Island, NY). Streptavidin magnetic bead was purchased from PerkinElmer (Waltham, MA). Alkaline phosphatase-conjugated streptavidin (Strep-AP) was purchased from Abcam (Cambridge, MA). AttoPhos® AP fluorescent substrate system component was purchased from Promega (Madison, WI). The 96 well polystyrene plates were purchased from Nunc™ A/S (Rochester, NY). All the other reagents were analytical grade.

**Equipment and software**

The ultrapure water (18.2 MΩ·cm) was produced by a Milli-Q System (Merck Millipore, Direct-Q 3, Billerica, MA) and used for buffer preparation in this work. The concentration of DNA and protein were measured by UV/Visible spectrophotometer (Biochrom, WPA Biowave II, Holliston, MA). The amplification of DNA, and evolution of ssDNA ligand pool were monitored by qPCR machine (QIAGEN, Rotor-Gene® Q, Venlo, Netherlands). The conformations of aptamers were characterized by using a circular dichroism spectropolarimeter (Jasco, J-810) (Easton, MD). The signal of ELISA was measured by a microplate reader (Molecular Devices, FlexStation 3) (Sunnyvale, CA). Secondary structures of aptamers were predicted by RNAstructure version 5.6 (Mathews lab) (Rochester, NY). Origin 8.5.1 (OriginLab) (Northampton, MA) was used to analyze and plot the data in this work.

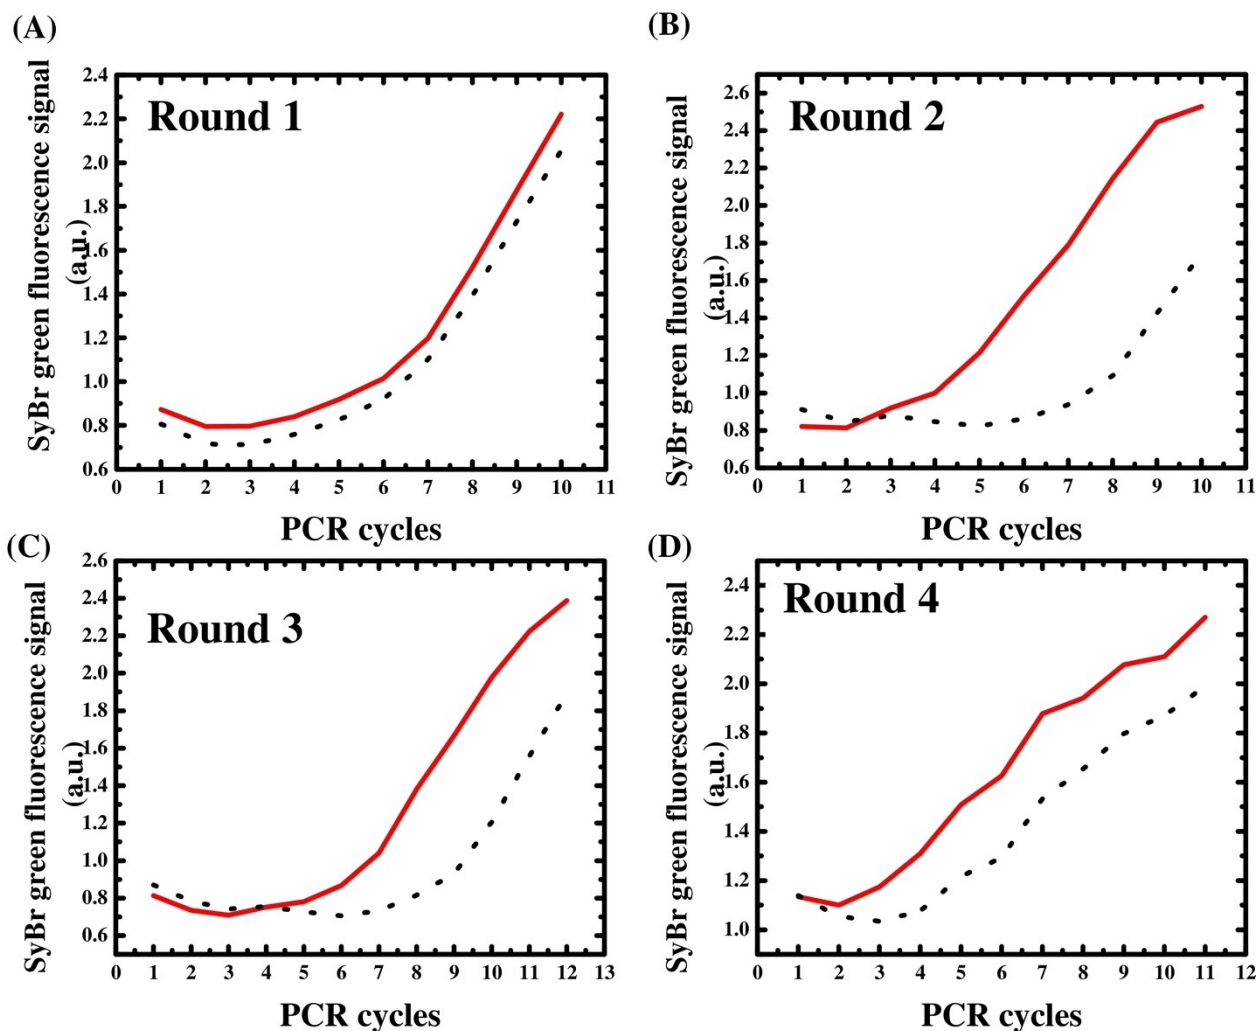

**Fig. S1** Differential qPCR analysis for monitoring the ssDNA ligand evolution of Library A from the 1<sup>st</sup> to 4<sup>th</sup> SELEX round ((A) to (D)). The specific ssDNA ligand binding to AMACR-coated beads (solid red line) is compared with the non-specific ssDNA ligand binding to HSA-coated beads (dash black line) in each sub-figure.

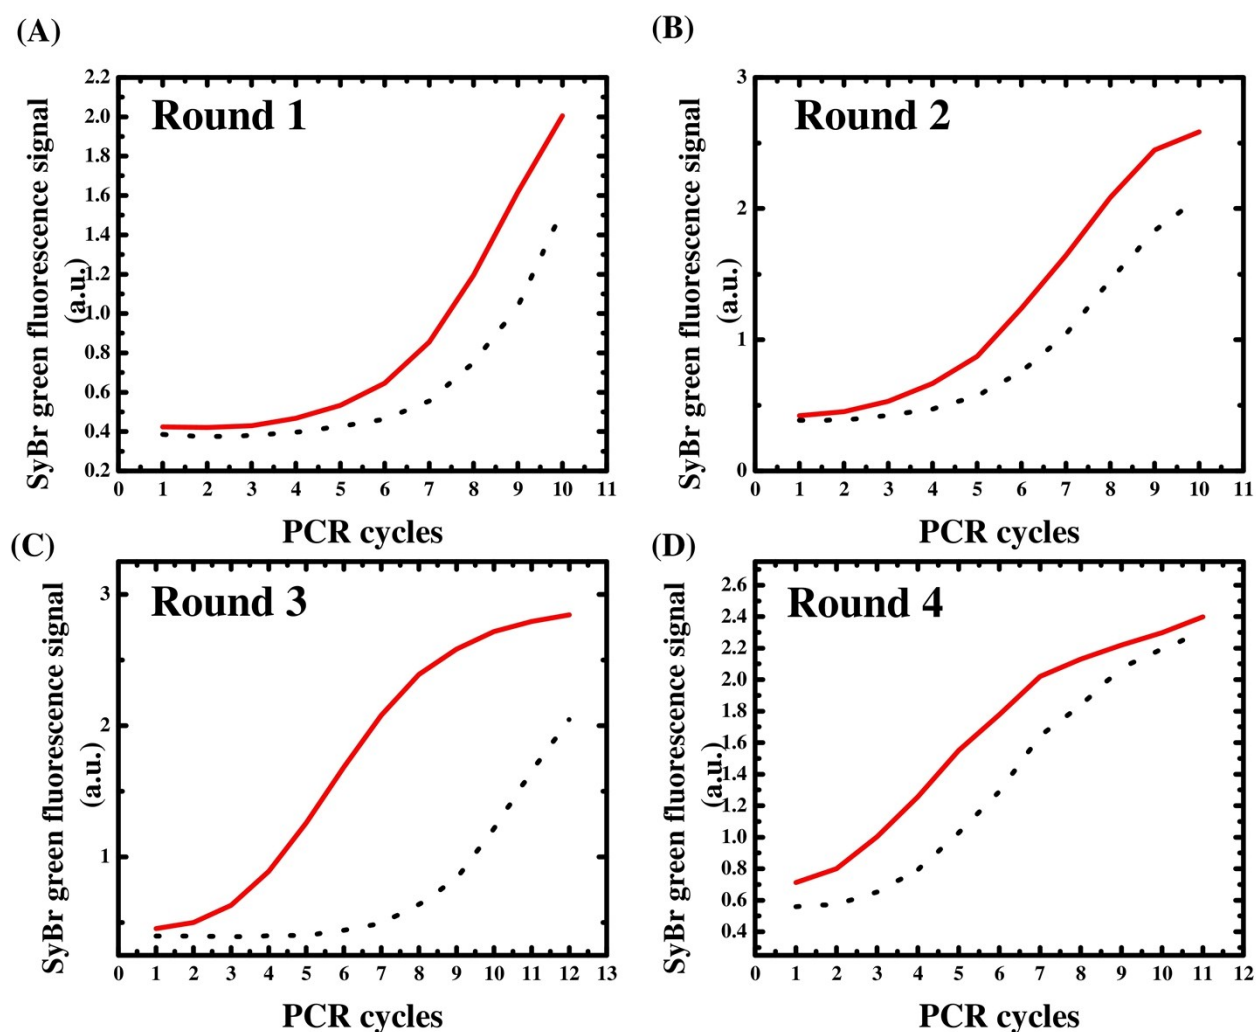

**Fig. S2** Differential qPCR analysis for monitoring the ssDNA ligand evolution of Library B from the 1<sup>st</sup> to 4<sup>th</sup> SELEX round ((A) to (D)). The specific ssDNA ligand binding to AMACR-coated beads (solid red line) is compared with the non-specific ssDNA ligand binding to HSA-coated beads (dash black line) in each sub-figure.

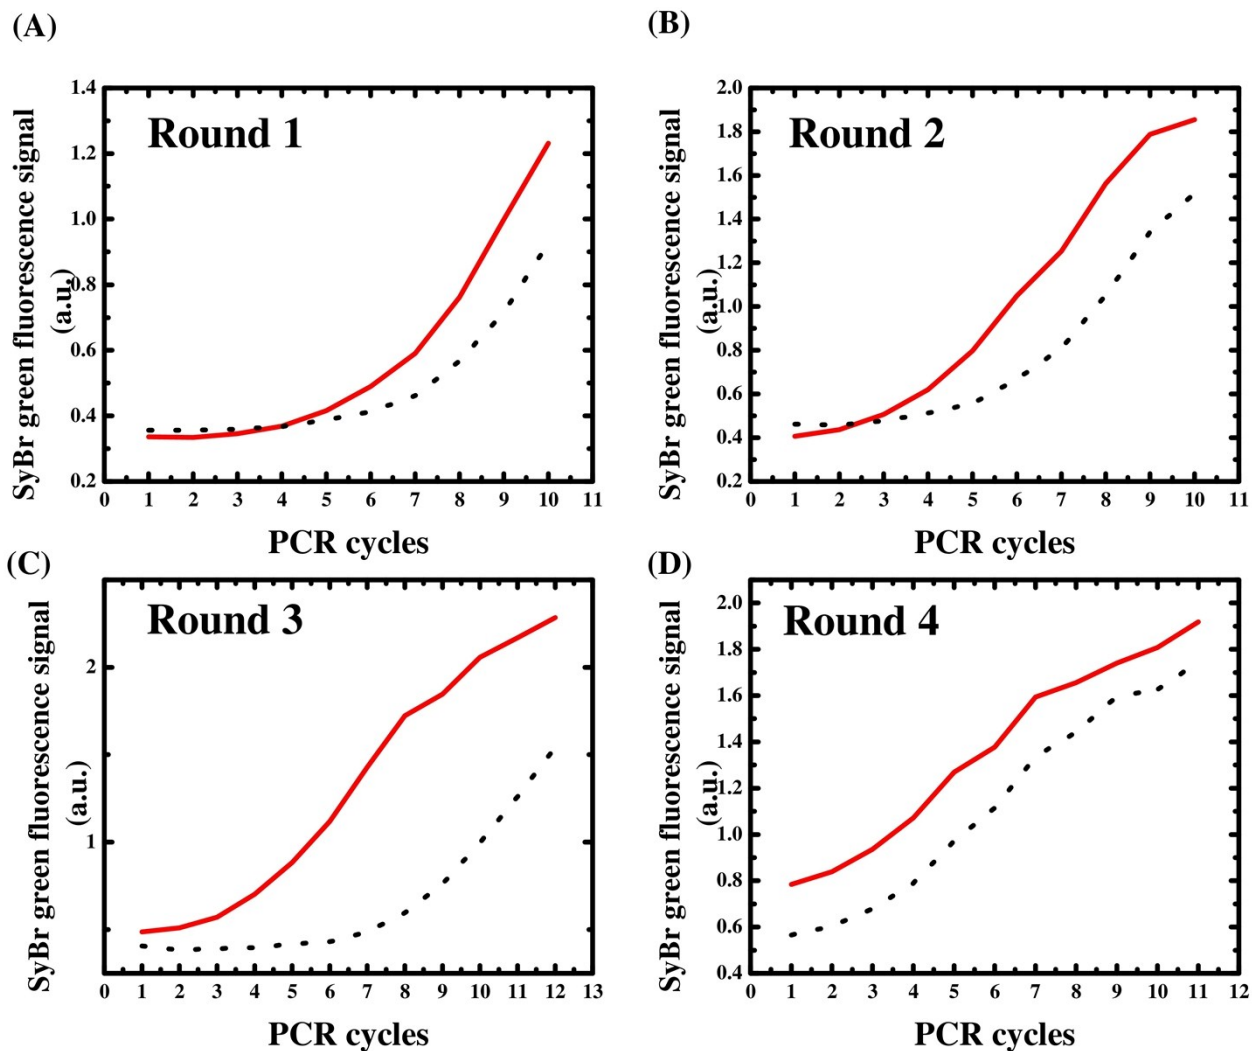

**Fig. S3** Differential qPCR analysis for monitoring the ssDNA ligand evolution of Library C from the 1<sup>st</sup> to 4<sup>th</sup> SELEX round ((A) to (D)). The specific ssDNA ligand binding to AMACR-coated beads (solid red line) is compared with the non-specific ssDNA ligand binding to HSA-coated beads (dash black line) in each sub-figure.

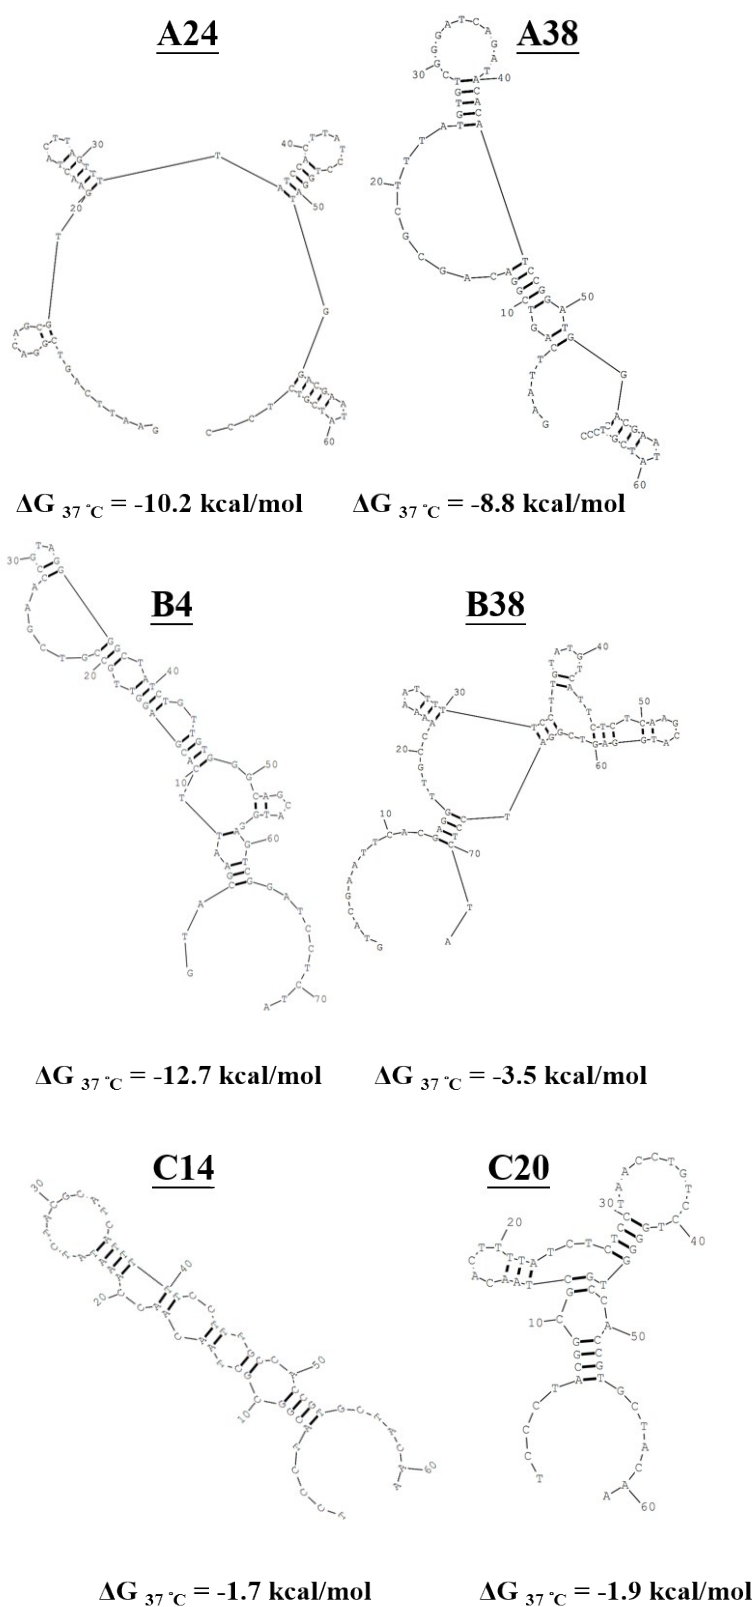

**Fig. S4** The secondary structure predictions for A24, A38, B4, B38, C14 and C20.

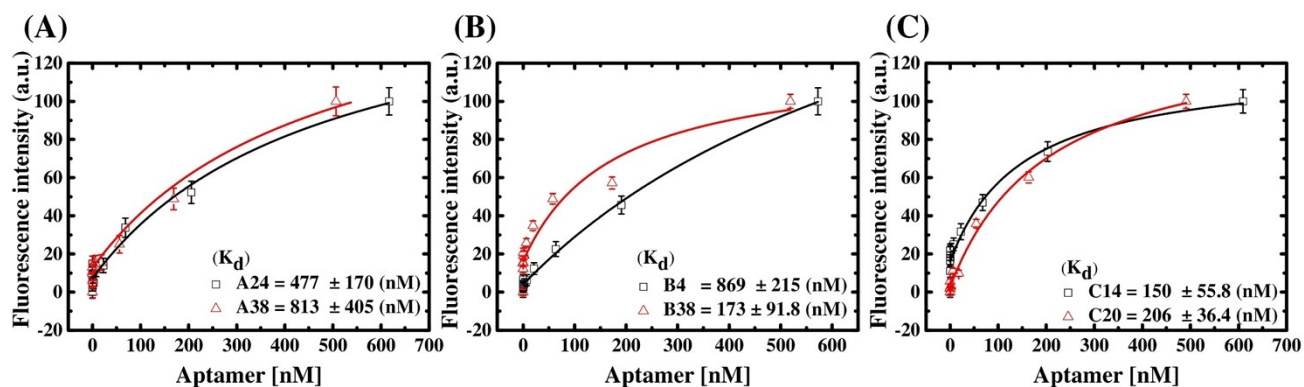

**Fig. S5** ELAA-based total-binding assays for the binding affinity estimation of the truncated aptamers ((A) A24 and A38; (B) B4 and B38; (C) C14 and C20). The AMACR concentration for microtiter plate's well coating was  $0.2 \mu\text{M}$ .

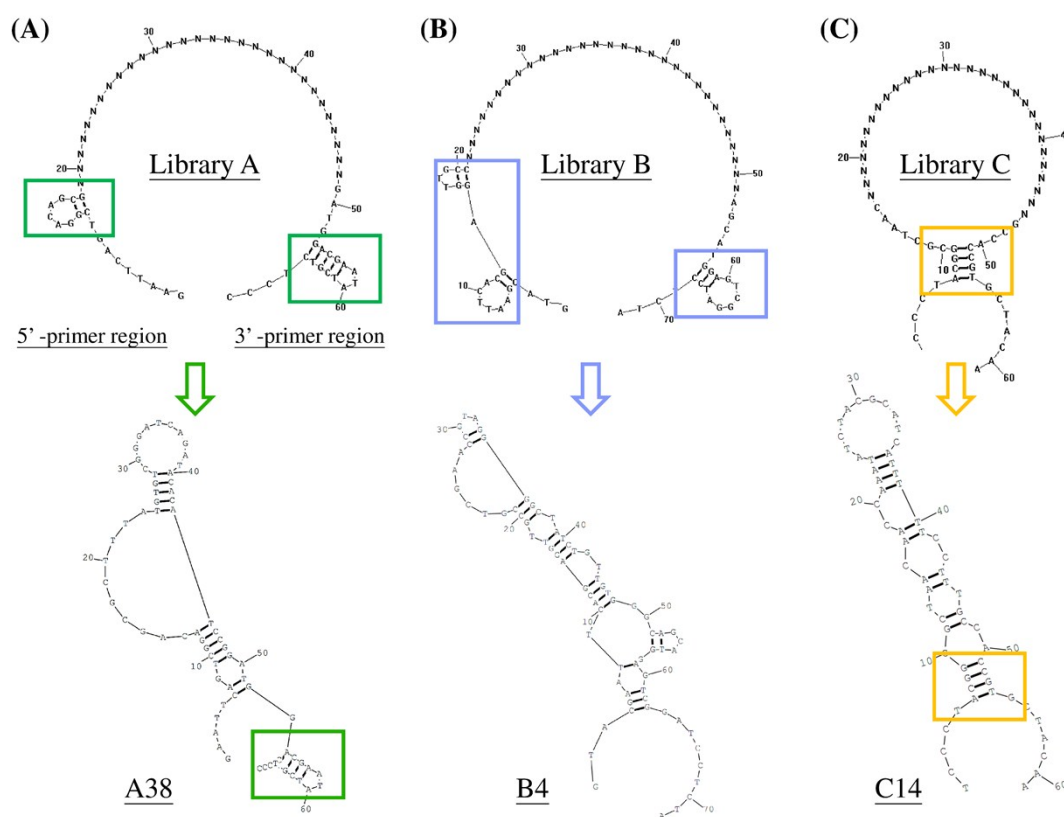

**Fig. S6** The 2<sup>nd</sup> structure prediction for (A) Library A and A38; (B) Library B and B4; (C) Library C and C14.

**Table S1** The sequences of the three kinds of ssDNA libraries and related primers in this study.

| <b>ID</b>               | <b>Sequence (5'---&gt;3')</b>                         | <b>Length(mer)</b> |
|-------------------------|-------------------------------------------------------|--------------------|
| Forward primer A        | GAATTCAGTCGGACAGCG                                    | 18                 |
| Reverse primer A        | GGGAGACGATATTCGTCCATC                                 | 21                 |
| Reverse primer-biotin A | Biotin-GGGAGACGATATTCGTCCATC                          | 21                 |
| Library A               | GAATTCAGTCGGACAGCG-(N30)-<br>GATGGACGAATATCGTCTCCC    | 69                 |
| Forward primer B        | GTACGAATTCACGAGGTTGCC                                 | 21                 |
| Reverse primer B        | TAGAGGATCCGACTCCATGCT                                 | 21                 |
| Reverse primer-biotin B | Biotin-TAGAGGATCCGACTCCATGCT                          | 21                 |
| Library B               | GTACGAATTCACGAGGTTGCC-(N30)-<br>AGCATGGAGTCGGATCCTCTA | 72                 |
| Forward primer C        | TCCCTACGGCGCTAAC                                      | 16                 |
| Reverse primer C        | TTGTAGCACGGTGGC                                       | 15                 |
| Reverse primer-biotin C | Biotin-TTGTAGCACGGTGGC                                | 15                 |
| Library C               | TCCCTACGGCGCTAAC-(N30)-<br>GCCACCGTGCTACAA            | 61                 |



**Table S2** The list of 28 aptamer sequences obtained from DNA Library A

| <b>ID</b> | <b>Sequence (<i>randomized</i> N30 region) _5' to 3'</b> | <b>CG%</b> |
|-----------|----------------------------------------------------------|------------|
| A10       | TCGATGATTCACTCTCGCATTTATCTTTTC                           | 36.7       |
| A11       | TACTCACAGTCTTGGCCCATACACCAGTCA                           | 50.0       |
| A12       | TAATCTGACGACGGCTCGGTAAAAGGTCCA                           | 50.0       |
| A20       | GACTCGTGGGCGTTACTTCCCAATTTGCT                            | 53.3       |
| A22       | ACATGATCAACCGTCGAACTCTAACCCAAC                           | 46.7       |
| A24       | TGAACTACTTAGTTTTATCCACTTATCCTG                           | 33.3       |
| A26       | ATGAACTCACCAATTTATCCCTATATCTTT                           | 30.0       |
| A38       | CTTTATGTGTCGGGATCAGATACACATCCG                           | 46.7       |
| A46       | GCATGTGATCGTACGGTCTGTTTTTTCTGC                           | 46.7       |
| A52       | CACAATGCATTCTTGCCTGTAAAGCATCTC                           | 43.3       |
| A53       | CCGTTGTTATCTGTTTCAACTCCACTTCTT                           | 40.0       |
| A54       | ACAATAGTTACAACCTTCTGTTCCCTCGTA                           | 36.7       |
| A56       | TAACAGGTAAATGCAGCCTAGTTCATTCAT                           | 36.7       |
| A6        | CAGATTCCAATTTTCCAAATTTTACATGT                            | 26.7       |
| A60       | TTGGAATCCGTTAATCCCTTTAAGCGCATT                           | 40.0       |
| A61       | CGATCGCAGACGCCAGTGAAGCGCAAGCA                            | 63.3       |
| A70       | TATCTTTCGTTTCTAATCATTTACATATTG                           | 23.3       |
| A71       | TACTTGACTGGTAATGTAGTTTGCACAACC                           | 43.3       |
| A72       | TGTTGGGTTAATTTGTTATCGTCTGACAT                            | 36.7       |
| A74       | TCTATAATAAATGCCATAAATCCGGCGAG                            | 40.0       |
| A77       | GTGATTTAGCGAGTTTCATGCATGCACACA                           | 43.3       |
| A82       | CTATAATCCGTTATCACAACTACTTCCCA                            | 40.0       |
| A84       | GAGTACTTTATAGGGATGCAGTGTGTAAGA                           | 40.0       |
| A86       | CATAATCAGTCTACATACATCCGCCCCGCT                           | 50.0       |
| A89       | ACTTAGGTTATCTTGCAACATCCATTTATT                           | 30.0       |
| A92       | ATCTCTTCACAGTCATGGGATAGTTACACA                           | 40.0       |
| A94       | TCTATATGCCATGATTCATATCAGATCCGG                           | 40.0       |
| A96       | ATGGGCCAATTTTATACTCCATATTATATA                           | 26.7       |
|           | <b>Avg.</b>                                              | 40.5       |
|           | <b>Stdv.</b>                                             | 8.66       |

**Table S3** The list of 33 aptamer sequences obtained from DNA Library B

| <b>ID</b> | <b>Sequence (randomized N30 region) _5' to 3'</b> | <b>CG%</b> |
|-----------|---------------------------------------------------|------------|
| B1        | GTGTGCCTACTCCGGCTGCACCTTCTATAG                    | 56.7       |
| B10       | ACTTAGTACTTTTTCTTTTTTTGTTTCCCG                    | 30.0       |
| B11       | GTCGGGGTGAGGCTCAGTTTGCCATAATCC                    | 56.7       |
| B12       | TCCCTTATCCACACTGATATTGTTTGTCAG                    | 40.0       |
| B13       | TGAAGCAATTCATGCCTTGACAGGATAAC                     | 43.3       |
| B17       | TTTAATTCACACATTTATTGTATGTTTAGT                    | 20.0       |
| B2        | TCGGTAGCTGGTTTACGAATGTTGGTTGGG                    | 50.0       |
| B20       | ATCTCGGCACCTTATGTGTTTTCCCCTTAA                    | 43.3       |
| B24       | TGGTTTTCTTCAGTATGTTTCTAGATATG                     | 33.3       |
| B25       | TATTTTTTCTCTTGGTATCTCATCTCGCTT                    | 33.3       |
| B3        | CACTGGTCCTGGCCTTCTTCTACTTCTTCG                    | 53.3       |
| B30       | TCCTTATAAATCCAATGTTTTCTTATGGTT                    | 26.7       |
| B34       | CCAGCTTCTCCCTTATGTTTTCCCCTACGG                    | 53.3       |
| B38       | AAAAATTTTTCTTGTATGTCATTCTCTCA                     | 26.7       |
| B4        | GTCGAACCGTAGGGGCTATCTGTTGTGGGC                    | 60.0       |
| B46       | TGTTATTACACTGCATTTTTCTATCCTAC                     | 33.3       |
| B5        | ATCTATGCCTGTTCTCTGCTCAGTCGTAGA                    | 46.7       |
| B50       | AATATGATGAAATTCGGTGTATTGTGTCTG                    | 33.3       |
| B51       | ATTTTTTATCTTTACGTTTGTTATAGTGCA                    | 23.3       |
| B59       | CCACTACCTACCCAAACTGCTAACCACCG                     | 56.7       |
| B6        | CCCACGGTCTTCTGACTTAGTCGCGTTGCC                    | 60.0       |
| B60       | TGTAGCTTCTATTATCTCGCCTTCCGCTT                     | 43.3       |
| B61       | ACCTACTCATTTTTATCTTCTTATGATACC                    | 30.0       |
| B62       | TCTCCTTATTCGAACGGGTTTTTAATCTA                     | 36.7       |
| B65       | GCCCTTTCATCCTCTGTGTAGGAATTCTCC                    | 50.0       |
| B68       | CCTGAGGGGTTGTGCGGAAGTGAGGTTGGG                    | 63.3       |
| B7        | CGCGGCTCACATTACCCTTTTTCACTCATG                    | 50.0       |
| B74       | GATTGTTCTTCGGACCCTATCCTCATAAC                     | 46.7       |
| B8        | TTTGCGAGTAGGGTCAGTCTCGGAGTGGGC                    | 60.0       |
| B84       | CGGCACCAATTTATAATTCTTCCCCTAATA                    | 36.7       |
| B86       | GATCAAGCTTTTTTTATGATCTTACCATT                     | 26.7       |
| B9        | AGCTCTTTTTTTCCATTAACCTTATCATT                     | 23.3       |
| B92       | AGTAGTCGTTTCCTTTGGGCTCTTTTTATC                    | 40.0       |
|           | <b>Avg.</b>                                       | 42.0       |
|           | <b>Stdv.</b>                                      | 12.4       |

**Table S4** The list of 31 aptamer sequences obtained from DNA Library C

| <b>ID</b> | <b>Sequence (<i>randomized</i> N30 region) _5' to 3'</b> | <b>CG%</b> |
|-----------|----------------------------------------------------------|------------|
| C10       | AGACATAACAGGGGGGTGAGGCAAGTGTGG                           | 56.7       |
| C12       | TCCTTACATAGTGGCTTGTCTCTCTCTCT                            | 46.7       |
| C13       | GGTCAGTAGGAACCTGCCTACGCATTAAGT                           | 46.7       |
| C14       | AACCAAATATCTACGCATCATTTTTCTTT                            | 30.0       |
| C15       | CCACAAGGAAGAGTGGGCTGAAACATGACC                           | 53.3       |
| C16       | CTCTACAGTGATTGGTAACAACGTTACAGT                           | 40.0       |
| C17       | TGGTGACACACAGGAACCCTCCTATGCATT                           | 50.0       |
| C19       | CAGTATTCTCTTCGTATCATACTCAGACT                            | 40.0       |
| C2        | TTCCATCTCGGGTACACATCCTCCATTTAG                           | 46.7       |
| C20       | ACTTTTATCTCTCCTAACCTGTCCTGGGGT                           | 46.7       |
| C21       | CACGTTGCACTGATTGACAACACCGATCTC                           | 50.0       |
| C22       | TTGCCCTTATTCTGTCTATTGCCCGGCCG                            | 56.7       |
| C23       | GTCATTATCCACCCCCACTTTGGTACTTTG                           | 46.7       |
| C24       | GTAACACCGTCCTATTAGATTCCCCCGCTC                           | 53.3       |
| C25       | CATAATTGTTAATTGTGTCTGGGCGTGCGG                           | 46.7       |
| C26       | ACGGGTTATAGTGCTGACTAACGGTTTGAG                           | 46.7       |
| C27       | CAACGTATTCTGGAAGATGAATATTGACAA                           | 33.3       |
| C28       | GTGTTTGAAACTGGAAGGTCTTGTTAGGGC                           | 46.7       |
| C29       | CCGATTGTTCATTTTTTTATATACATGCTG                           | 30.0       |
| C3        | ACAATTAGTTCTTATGAACGTGGTTCCAGG                           | 40.0       |
| C30       | ACAATCCCCCGTCTTGCTGTGTGTCTAATA                           | 46.7       |
| C32       | GACAGGCGATGGCAGGGTCATCTTCAATGT                           | 53.3       |
| C33       | CCCATTATCTAGACAGTCGCCCCCTCCTTC                           | 56.7       |
| C34       | GAACAACAAATACACATCTCGGTTTACGAG                           | 40.0       |
| C35       | GGAGTTGAATAAGTTTGTGAGCTTTTTAG                            | 33.3       |
| C4        | GTCCTGCTCACATACTCACATCTATTATTT                           | 36.7       |
| C5        | GACTTGCTACCAGCCTATCATGAACCCTAA                           | 46.7       |
| C6        | AATTCAGGGGAACTGGGTCAAGAGTCCTTC                           | 50.0       |
| C7        | GATTCCTTCAGCATCGCGACCTAAGGACGG                           | 56.7       |
| C8        | CGACTCCTTCCCGATCTAACCAGTTGTTTA                           | 46.7       |
| C9        | CAGATTTAATCTATTTTACTTTCCTGAGAT                           | 26.7       |
|           | <b>Avg.</b>                                              | 45.2       |
|           | <b>Stdv.</b>                                             | 8.21       |

**Table S5** The six pairs of aptamer candidates from Library A, Library B and Library C.

| Name       | Sequence ( <i>randomized</i> N30 region) _5' to 3' | Alignment score (%) |
|------------|----------------------------------------------------|---------------------|
| <u>A24</u> | TGAACTACTTAGTTTTATCCACTTATCCTG                     | 77                  |
| A26        | ATGAACTCACCAATTTATCCCTATATCTTT                     |                     |
| <u>A38</u> | CTTTATGTGTCGGGATCAGATACACATCCG                     | 70                  |
| A94        | TCTATATGCCATGATTCATATCAGATCCGG                     |                     |
| B25        | TATTTTTTCTCTTGGTATCTCATCTCGCTT                     | 73                  |
| <u>B38</u> | AAAAATTTTTCCTTGTATGTCATTCTCTCA                     |                     |
| B2         | TCGGTAGCTGGTTTACGAATGTTGGTTGGG                     | 70                  |
| <u>B4</u>  | GTCGAACCGTAGGGGCTATCTGTTGTGGGC                     |                     |
| <u>C20</u> | ACTTTTATCTCTCCTAACCTGTCCTGGGGT                     | 66                  |
| C9         | CAGATTTAATCTATTTTACTTTCCTGAGAT                     |                     |
| <u>C14</u> | AACCAAATATCTACGCATATTTTTCCTTT                      | 60                  |
| C23        | GTCATTATCCACCCCCACTTTGGTACTTTG                     |                     |
